# Supplementary material for: Model-Informed Translation of In Vitro Effects of Short-, Prolonged- and Continuous-Infusion Meropenem against Pseudomonas aeruginosa to Clinical Settings
Source: MDPI journal article supplement (doi:10.3390/antibiotics11081036), 2022-08-01
Supplement: s1 [file s1]

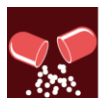

Supplementary data

# Model-informed translation of *in vitro* effects of short-, prolonged- and continuous-infusion meropenem against *Pseudomonas aeruginosa* to clinical settings

Iris K. Minichmayr, Suzanne Kappetein, Margreke J.E. Brill and Lena E. Friberg \*

Department of Pharmacy, Uppsala University, Box 580, 75123 Uppsala, Sweden

\* Correspondence: lena.friberg@farmaci.uu.se; Tel.: +46 18 471 4685

**Table S1.** Overview of the population pharmacokinetic models used to inform the pharmacokinetic/pharmacodynamic (PKPD) model (bold scenarios mark the default settings adopted for simulations of other populations).

| Ref.                 | Population                                                | Covariates, parameters                                                                                                      | Dosing                                                                     | Sampling                                                                          | Simulated scenarios                                                                                                                                                                                                                                           |
|----------------------|-----------------------------------------------------------|-----------------------------------------------------------------------------------------------------------------------------|----------------------------------------------------------------------------|-----------------------------------------------------------------------------------|---------------------------------------------------------------------------------------------------------------------------------------------------------------------------------------------------------------------------------------------------------------|
| Li et al. 2006       | Adults with intra-abdominal infections, CAP or VAP (n=79) | CLCR <sub>IBW</sub> _CL, Age_CL, WT_V (CLCR=83 mL/min, Age=35 y, WT=70 kg)<br>CL=14.6 L/h, V1=10.8 L, V2=12.6 L, Q=18.6 L/h | 500/1000/2000 mg, 0.5/3 h, q8h                                             | 3 <sup>rd</sup> dose interval or steady state, n=341                              | Plasma<br><b>k<sub>growth</sub>, k<sub>death</sub> 100%, -40%</b><br><b>Initial bacterial load 10<sup>6</sup> and 10<sup>8</sup> CFU/mL</b><br><b>ARU551 (MIC 16 mg/L):</b><br>EC <sub>50</sub> 4.4–35.4 mg/L<br>ATCC27853 (MIC 1 mg/L)<br>CLCR 30/250 mL/min |
| Delattre et al. 2012 | Patients with severe sepsis or septic shock (n=19)        | CLCR_CL (CLCR=100 mL/min)<br>WT_all parameters (WT=70 kg)<br>CL=9.87 L/h, V1=24.4 L, V2=7.01 L, Q=4.97 L/h                  | 1000 mg, 0.5 h, q8h                                                        | 1, 1.5, 4.5, 6 or 8, 24 h, first 24 h of therapy                                  | Plasma, lung (30% exposure)                                                                                                                                                                                                                                   |
| Roberts et al. 2009  | Critically ill with sepsis, no renal dysfunction (n=10)   | CLCR_CL (CLCR=100 mL/min)<br>CL=13.6 L/h, V1=7.9 L, V2=14.8 L, Q=56.3 L/h                                                   | 1500 mg (1 <sup>st</sup> dose), then 1000 mg q8h; 3000 mg/24 h + LD 500 mg | Day 1: 0–8 h (15x)<br>Days 2–5: 0–8 h (9x)<br>n=222                               | Plasma, lung (30% exposure)                                                                                                                                                                                                                                   |
| Doh et al. 2010      | Burns patients (n=59)                                     | CLCR_CL, Oedema_V1 (CLCR=135 mL/min)<br>CL=4.45 L/h, V1=17.0 L, V2=10.1 L, Q=5.25 L/h                                       | 500–1000 mg, 0.5 h, q8h/q12h                                               | 0, 1, 2, 4, 6, 8, 9, 24 and 25 h (after start of 4 <sup>th</sup> dose)            | Plasma                                                                                                                                                                                                                                                        |
| Wittau et al. 2010   | Morbidly obese, intraperitoneal surgery (n=6)             | Fat free mass on all parameters (FFM=53 kg)<br>CL=18.7 L/h, V1=21.5 L, V2=6.16 L, Q=29.4 L/h, FSC=0.721, FPF=0.943          | 1000 mg, 15 min, q8h                                                       | ≤8h (0.5, 1, 2, 3, 5, 8 h) after 4 <sup>th</sup> dose                             | Plasma, subcutaneous tissue (SC), peritoneal fluid (PF)                                                                                                                                                                                                       |
| Lu et al. 2015       | Patients with meningitis after neurosurgery (n=82)        | No covariates<br>CL=22.2 L/h, V1=17.9 L, V2=3.84 L, Q=1.79 L/h, VCSF=0.13 L, QCSF=0.01 L/h, PC=0.172                        | 1000 mg, q8h/q6h, 2000 mg, 1 g/h, q8h                                      | during inf., 0.17, 2, 4 h after, or: at inf. end, 1 h, 3 h after end, before next | Plasma, cerebrospinal fluid (CSF)                                                                                                                                                                                                                             |

Abbreviations: Ref.: Reference, CAP: community-acquired pneumonia; VAP: ventilator-associated pneumonia; CLCR: creatinine clearance; CLCR<sub>IBW</sub>: CLCR calculated based on ideal body weight; WT: total body weight; CL: clearance; V1/V2: central/peripheral volume of distribution; Q: inter-compartmental clearance; FSC/FPF: factors quantifying penetration of meropenem in subcutaneous tissue and peritoneal fluid; CSF: cerebrospinal fluid; PC: transfer multiplier between central and CSF compartment; q6h/q8h/q12h: every 6/8/12 h; LD: loading dose; inf.: infusion; k<sub>growth</sub>/k<sub>death</sub>: growth/death rate constant in PKPD model; CFU: colony-forming unit.

**Table S2.** Total bacterial load at 8 h and 24 h after start of therapy based on median PKPD profiles.

| Model            | Population         | Scenario                                            | B <sub>tot</sub><br>time | Total bacterial load (B <sub>tot</sub> , median profile) |             |                |             |             |                   |             |                |             |             |
|------------------|--------------------|-----------------------------------------------------|--------------------------|----------------------------------------------------------|-------------|----------------|-------------|-------------|-------------------|-------------|----------------|-------------|-------------|
|                  |                    |                                                     |                          | TDD ~3000 mg/day                                         |             |                |             |             | TDD ~6000 mg/day  |             |                |             |             |
|                  |                    |                                                     |                          | II 1000 mg<br>q8h                                        |             | CI 3000 mg/24h |             |             | II 2000 mg<br>q8h |             | CI 6000 mg/24h |             |             |
|                  |                    |                                                     |                          | 0.5h                                                     | 3h          | no LD          | LD<br>500   | LD<br>1000  | 0.5h              | 3h          | no LD          | LD<br>500   | LD<br>1000  |
| Li<br>2006       | Infected adults    | Default (Plasma,<br>CLCR 83 mL/min,<br>MIC 16 mg/L) | 8 h                      | 7.29                                                     | 7.28        | 7.79           | 7.13        | 6.40        | 6.49              | <b>5.95</b> | 6.30           | <b>5.59</b> | <b>4.92</b> |
|                  |                    |                                                     | 24 h                     | 9.14                                                     | 9.04        | 9.02           | 9.07        | 9.00        | 7.39              | <b>5.78</b> | <b>5.62</b>    | <b>5.34</b> | <b>5.27</b> |
| Doh<br>2010      | Burns              | Plasma                                              | 8 h                      | 7.27                                                     | 7.31        | 7.82           | 7.19        | 6.46        | 6.56              | 6.03        | 6.40           | <b>5.69</b> | <b>5.03</b> |
|                  |                    |                                                     | 24 h                     | 9.13                                                     | 9.05        | 9.02           | 9.07        | 9.03        | 7.54              | <b>5.92</b> | <b>5.74</b>    | <b>5.39</b> | <b>5.28</b> |
| Delattre<br>2012 | Sepsis             | Plasma                                              | 8 h                      | 6.90                                                     | 6.97        | 7.58           | 6.62        | <b>5.45</b> | <b>5.44</b>       | <b>5.21</b> | <b>5.82</b>    | <b>4.99</b> | <b>4.26</b> |
|                  |                    |                                                     | 24 h                     | 8.12                                                     | 8.00        | 8.55           | 7.85        | 6.47        | <b>5.25</b>       | <b>5.24</b> | <b>5.24</b>    | <b>5.24</b> | <b>5.24</b> |
|                  |                    | Lung                                                | 8 h                      | 8.06                                                     | 8.12        | 8.16           | 8.11        | 7.95        | 7.61              | 7.77        | 8.02           | 7.93        | 7.70        |
|                  |                    |                                                     | 24 h                     | 9.05                                                     | 9.04        | 9.04           | 9.05        | 9.06        | 9.08              | 9.02        | 9.01           | 9.02        | 9.05        |
| Roberts<br>2009  | Sepsis             | Plasma                                              | 8 h                      | 7.12                                                     | 7.18        | 7.72           | 6.98        | 6.09        | 6.18              | <b>5.73</b> | 6.11           | <b>5.33</b> | <b>4.64</b> |
|                  |                    |                                                     | 24 h                     | 8.97                                                     | 8.94        | 9.00           | 9.02        | 8.73        | 6.47              | <b>5.42</b> | <b>5.32</b>    | <b>5.26</b> | <b>5.25</b> |
|                  |                    | Lung                                                | 8 h                      | 8.06                                                     | 8.13        | 8.17           | 8.13        | 7.99        | 7.66              | 7.85        | 8.06           | 8.00        | 7.82        |
|                  |                    |                                                     | 24 h                     | 9.05                                                     | 9.05        | 9.05           | 9.05        | 9.06        | 9.16              | 9.04        | 9.04           | 9.05        | 9.06        |
| Lu<br>2016       | Neurosurgery       | Plasma                                              | 8 h                      | 7.51                                                     | 7.65        | 8.02           | 7.65        | 7.15        | 7.03              | 6.58        | 7.22           | 6.77        | 6.25        |
|                  |                    |                                                     | 24 h                     | 9.20                                                     | 9.07        | 9.04           | 9.08        | 9.13        | 8.85              | 7.68        | 8.74           | 8.52        | 8.13        |
|                  |                    | Cerebrospinal<br>fluid                              | 8 h                      | 8.18                                                     | 8.18        | 8.18           | 8.18        | 8.18        | 8.18              | 8.18        | 8.18           | 8.18        | 8.18        |
|                  |                    |                                                     | 24 h                     | 9.05                                                     | 9.05        | 9.05           | 9.05        | 9.05        | 9.05              | 9.05        | 9.05           | 9.05        | 9.05        |
| Wittau<br>2015   | Obese              | Plasma                                              | 8 h                      | 7.39                                                     | 7.56        | 7.95           | 7.51        | 6.81        | 6.60              | 6.32        | 6.91           | 6.36        | <b>5.63</b> |
|                  |                    |                                                     | 24 h                     | 9.19                                                     | 9.07        | 7.04           | 9.09        | 9.16        | 7.77              | 6.87        | 7.65           | 7.13        | 6.42        |
|                  |                    | s.c. interstitial<br>space fluid                    | 8 h                      | 7.68                                                     | 7.87        | 8.08           | 7.87        | 7.37        | 6.97              | 6.92        | 7.55           | 7.24        | 6.66        |
|                  |                    |                                                     | 24 h                     | 9.15                                                     | 9.04        | 9.04           | 9.06        | 9.12        | 8.72              | 8.56        | 8.97           | 8.97        | 8.83        |
|                  |                    | Peritoneal<br>fluid                                 | 8 h                      | 7.43                                                     | 7.60        | 7.97           | 7.56        | 6.89        | 6.65              | 6.39        | 7.01           | 6.49        | <b>5.77</b> |
|                  |                    |                                                     | 24 h                     | 8.42                                                     | 8.35        | 8.71           | 8.53        | 8.39        | 7.76              | 6.96        | 7.21           | 6.92        | 6.55        |
|                  |                    | CLCR 30 mL/min                                      | 8 h                      | 6.44                                                     | 6.33        | 7.03           | <b>5.61</b> | <b>4.53</b> | <b>4.96</b>       | <b>4.54</b> | <b>4.89</b>    | <b>4.17</b> | <b>3.95</b> |
|                  |                    |                                                     | 24 h                     | 6.89                                                     | 6.23        | 6.71           | <b>5.49</b> | <b>5.26</b> | <b>5.22</b>       | <b>5.23</b> | <b>5.24</b>    | <b>5.24</b> | <b>5.24</b> |
|                  |                    | CLCR 250 mL/min                                     | 8 h                      | 7.72                                                     | 7.89        | 8.10           | 7.87        | 7.53        | 7.36              | 7.03        | 7.68           | 7.38        | 6.99        |
|                  |                    |                                                     | 24 h                     | 9.15                                                     | 9.05        | 9.05           | 9.07        | 9.10        | 9.18              | 8.82        | 9.03           | 9.05        | 9.07        |
| Li<br>2006       | Infected<br>adults | EC <sub>50</sub> 4.4 mg/L                           | 8 h                      | <b>5.50</b>                                              | <b>4.71</b> | <b>4.19</b>    | <b>3.90</b> | <b>3.85</b> | <b>4.51</b>       | <b>3.98</b> | <b>3.88</b>    | <b>3.85</b> | <b>3.80</b> |
|                  |                    |                                                     | 24 h                     | <b>5.72</b>                                              | <b>5.22</b> | <b>5.24</b>    | <b>5.23</b> | <b>5.19</b> | <b>4.69</b>       | <b>5.02</b> | <b>5.16</b>    | <b>5.15</b> | <b>5.10</b> |
|                  |                    | EC <sub>50</sub> 8.8 mg/L                           | 8 h                      | 6.49                                                     | <b>5.95</b> | 6.30           | <b>4.92</b> | <b>4.34</b> | <b>5.51</b>       | <b>4.71</b> | <b>4.20</b>    | <b>3.95</b> | <b>3.90</b> |
|                  |                    |                                                     | 24 h                     | 7.39                                                     | <b>5.78</b> | <b>5.62</b>    | <b>5.27</b> | <b>5.25</b> | <b>5.23</b>       | <b>5.22</b> | <b>5.24</b>    | <b>5.24</b> | <b>5.23</b> |
|                  |                    | EC <sub>50</sub> 35.4 mg/L                          | 8 h                      | 7.82                                                     | 8.00        | 8.12           | 7.97        | 7.62        | 7.29              | 7.28        | 7.79           | 7.57        | 7.13        |
|                  |                    |                                                     | 24 h                     | 9.11                                                     | 9.04        | 9.04           | 9.06        | 9.09        | 9.14              | 9.04        | 9.02           | 9.04        | 9.07        |
|                  |                    | k <sub>growth</sub> , k <sub>death</sub> -40%       | 8 h                      | 6.41                                                     | 6.40        | 6.92           | 6.25        | <b>5.52</b> | <b>5.61</b>       | <b>5.07</b> | <b>5.43</b>    | <b>4.73</b> | <b>4.14</b> |
|                  |                    |                                                     | 24 h                     | 7.16                                                     | 7.06        | 8.26           | 7.64        | 6.87        | <b>4.90</b>       | <b>4.43</b> | <b>4.43</b>    | <b>4.42</b> | <b>4.42</b> |
|                  |                    | k <sub>growth</sub> -40%                            | 8 h                      | 6.16                                                     | 6.15        | 6.67           | <b>6.00</b> | <b>5.27</b> | <b>5.36</b>       | <b>4.82</b> | <b>5.18</b>    | <b>4.48</b> | <b>3.98</b> |
|                  |                    |                                                     | 24 h                     | 6.42                                                     | 6.32        | 7.57           | 6.90        | 6.13        | <b>4.16</b>       | <b>3.68</b> | <b>3.68</b>    | <b>3.67</b> | <b>3.67</b> |
|                  |                    | Higher initial<br>bact. load (S)                    | 8 h                      | 9.01                                                     | 8.97        | 9.11           | 8.85        | 8.31        | 8.41              | 7.90        | 8.19           | 7.57        | 6.95        |
|                  |                    |                                                     | 24 h                     | 8.97                                                     | 8.89        | 8.92           | 8.92        | 8.97        | 8.75              | 7.63        | 7.26           | 7.19        | 7.20        |
|                  |                    | Higher initial<br>bact. load (SR)                   | 8 h                      | 9.00                                                     | 8.96        | 9.10           | 8.84        | 8.30        | 8.40              | 7.88        | 8.18           | 7.56        | 6.98        |
|                  |                    |                                                     | 24 h                     | 8.96                                                     | 8.89        | 8.92           | 8.92        | 8.97        | 8.75              | 7.62        | 7.26           | 7.19        | 7.20        |

Abbreviations: TDD: total daily dose; II: intermittent dosing; CI: continuous infusion; q8/24h: every 8/24 hours; LD: loading dose (in mg); CLCR: creatinine clearance; MIC: minimum inhibitory concentration; s.c. subcutaneous; EC<sub>50</sub>: drug concentration (mg/L) that produces 50% of maximum achievable kill rate constant; k<sub>growth</sub>: rate constant of bacterial growth; k<sub>death</sub>: rate constant of natural bacterial death; higher initial bacterial load: 8 log<sub>10</sub> CFU/mL, either assumed to be susceptible (S) or with an initial fraction in the resting state (SR); categories/colour code (scenarios with initial bacterial load 6 log<sub>10</sub> CFU/mL): bacteriostasis/net bacterial kill (bold values): >5-6 log<sub>10</sub> CFU/mL (beige), >4-5 log<sub>10</sub> CFU/mL (light cyan), ≤4 log<sub>10</sub> CFU/mL (mint); net bacterial growth (non-bold values): >6-7 log<sub>10</sub> CFU/mL (light red), >7-8 log<sub>10</sub> CFU/mL (lilac), >8 log<sub>10</sub> CFU/mL (violet red). Colours were intended to be accessible to people who are colour-blind (<https://davidmathlogic.com/colorblind>; access date 26.07.2022).

**Table S3.**  $fT_{>MIC}$  at 8 h and 24 h after start of therapy based on median PKPD profiles.

| Model            | Population         | Scenario                                            | $fT_{>MIC}$<br>time | $fT_{>MIC}$ (median profile) |             |                |             |             |                   |             |                |             |             |
|------------------|--------------------|-----------------------------------------------------|---------------------|------------------------------|-------------|----------------|-------------|-------------|-------------------|-------------|----------------|-------------|-------------|
|                  |                    |                                                     |                     | TDD ~3000 mg/day             |             |                |             |             | TDD ~6000 mg/day  |             |                |             |             |
|                  |                    |                                                     |                     | II 1000 mg<br>q8h            |             | CI 3000 mg/24h |             |             | II 2000 mg<br>q8h |             | CI 6000 mg/24h |             |             |
|                  |                    |                                                     |                     | 0.5h                         | 3h          | no LD          | LD<br>500   | LD<br>1000  | 0.5h              | 3h          | no LD          | LD<br>500   | LD<br>1000  |
| Li<br>2006       | Infected adults    | Default (Plasma,<br>CLCR 83 mL/min,<br>MIC 16 mg/L) | 8 h                 | 14.6                         | 12.2        | 0              | 6.7         | 21.9        | 29.6              | 42.8        | 0.7            | 51.8        | <u>98.1</u> |
|                  |                    |                                                     | 24 h                | 14.9                         | 14.6        | 0              | 2.2         | 7.3         | 30.2              | 43.9        | 66.9           | 82.9        | <u>99.3</u> |
| Doh<br>2010      | Burns              | Plasma                                              | 8 h                 | 16.5                         | 12.9        | 0              | 7.7         | 22.3        | 27.9              | 41.7        | 0              | 19.6        | <u>98.3</u> |
|                  |                    |                                                     | 24 h                | 16.8                         | 15.0        | 0              | 2.6         | 7.4         | 28.7              | 43.1        | 51.9           | 65.9        | <u>99.4</u> |
| Delattre<br>2012 | Sepsis             | Plasma                                              | 8 h                 | 20.6                         | 17.9        | 0              | 5.3         | 44.8        | 49.1              | 57.3        | 54.3           | 87.1        | <u>97.3</u> |
|                  |                    |                                                     | 24 h                | 24.2                         | 25.4        | 0              | 2.6         | 15.4        | 53.1              | 65.3        | 84.8           | <u>95.7</u> | <u>99.1</u> |
|                  |                    | Lung                                                | 8 h                 | 0                            | 0           | 0              | 0           | 0           | 2.2               | 0           | 0              | 0           | 0           |
|                  |                    |                                                     | 24 h                | 0                            | 0           | 0              | 0           | 0           | 8.5               | 0           | 0              | 0           | 0           |
| Roberts<br>2009  | Sepsis             | Plasma                                              | 8 h                 | 18.8                         | 15.0        | 0              | 5.4         | 30.2        | 35.9              | 47.5        | 45.0           | 94.9        | <u>99.0</u> |
|                  |                    |                                                     | 24 h                | 19.3                         | 16.5        | 0              | 1.8         | 10.1        | 36.5              | 48.9        | 81.7           | 89.3        | <u>99.7</u> |
|                  |                    | Lung                                                | 8 h                 | 0                            | 0           | 0              | 0           | 0           | 2.3               | 0           | 0              | 0           | 0           |
|                  |                    |                                                     | 24 h                | 0                            | 0           | 0              | 0           | 0           | 7.1               | 0           | 0              | 0           | 0           |
| Lu<br>2016       | Neurosurgery       | Plasma                                              | 8 h                 | 12.7                         | 0           | 0              | 4.6         | 15.4        | 20.8              | 34.6        | 0              | 6.5         | 20.4        |
|                  |                    |                                                     | 24 h                | 12.8                         | 0           | 0              | 1.5         | 5.1         | 20.8              | 34.7        | 0              | 2.2         | 6.8         |
|                  |                    | Cerebrospinal<br>fluid                              | 8 h                 | 0                            | 0           | 0              | 0           | 0           | 0                 | 0           | 0              | 0           | 0           |
|                  |                    |                                                     | 24 h                | 0                            | 0           | 0              | 0           | 0           | 0                 | 0           | 0              | 0           | 0           |
| Wittau<br>2015   | Obese              | Plasma                                              | 8 h                 | 14.2                         | 0           | 0              | 0.4         | 19.4        | 28.7              | 37.7        | 0              | 0.4         | 35.0        |
|                  |                    |                                                     | 24 h                | 14.4                         | 0           | 0              | 0.1         | 6.5         | 28.7              | 38.3        | 0              | 0.1         | 11.7        |
|                  |                    | s.c. interstitial<br>space fluid                    | 8 h                 | 2.6                          | 0           | 0              | 0           | 3.3         | 7.4               | 8.5         | 0              | 0           | 4.6         |
|                  |                    |                                                     | 24 h                | 8.0                          | 0           | 0              | 0           | 3.3         | 22.4              | 26.0        | 0              | 0           | 4.6         |
|                  |                    | Peritoneal<br>fluid                                 | 8 h                 | 4.5                          | 0           | 0              | 0           | 6.0         | 9.3               | 12.2        | 0              | 0           | 10.4        |
|                  |                    |                                                     | 24 h                | 13.5                         | 0           | 0              | 0           | 6.0         | 28.0              | 36.9        | 0              | 0           | 10.4        |
|                  |                    | CLCR 30 mL/min                                      | 8 h                 | 29.0                         | 34.4        | 0              | 34.0        | <u>98.3</u> | 58.5              | 70.9        | 74.7           | <u>97.3</u> | <u>99.0</u> |
|                  |                    |                                                     | 24 h                | 32.5                         | <u>40.5</u> | 0              | 16.5        | <u>48.6</u> | 61.7              | 76.3        | 91.5           | <u>99.1</u> | <u>99.7</u> |
| Li<br>2006       | Infected<br>adults | CLCR 250 mL/min                                     | 8 h                 | 8.3                          | 0           | 0              | 3.1         | 9.2         | 14.2              | 27.7        | 0              | 3.3         | 10.4        |
|                  |                    |                                                     | 24 h                | 8.3                          | 0           | 0              | 1.0         | 3.1         | 14.3              | 28.1        | 0              | 1.1         | 3.5         |
|                  |                    | EC <sub>50</sub> 4.4 mg/L                           | 8 h                 | <u>47.1</u>                  | <u>62.9</u> | <u>89.6</u>    | <u>99.8</u> | <u>100</u>  | <u>65.2</u>       | <u>82.0</u> | <u>96.9</u>    | <u>99.8</u> | <u>100</u>  |
|                  |                    |                                                     | 24 h                | <u>47.5</u>                  | <u>64.0</u> | <u>96.5</u>    | <u>99.9</u> | <u>100</u>  | <u>65.8</u>       | <u>83.1</u> | <u>99.0</u>    | <u>99.9</u> | <u>99.8</u> |
|                  |                    | EC <sub>50</sub> 8.8 mg/L                           | 8 h                 | 29.6                         | <u>42.8</u> | 0.7            | <u>98.1</u> | <u>99.4</u> | 47.1              | 62.9        | 89.6           | <u>99.0</u> | <u>99.9</u> |
|                  |                    |                                                     | 24 h                | 30.2                         | <u>43.9</u> | <u>66.9</u>    | <u>99.3</u> | <u>99.7</u> | 47.5              | 64.0        | <u>96.5</u>    | <u>99.7</u> | <u>99.9</u> |
|                  |                    | EC <sub>50</sub> 35.4 mg/L                          | 8 h                 | 5.6                          | 0           | 0              | 0           | 6.2         | 14.6              | 12.2        | 0              | 0           | 6.7         |
|                  |                    |                                                     | 24 h                | 5.8                          | 0           | 0              | 0           | 2.1         | 14.9              | 14.6        | 0              | 0           | 2.2         |
|                  |                    | k <sub>growth</sub> , k <sub>death</sub> -40%       | 8 h                 | 14.6                         | 12.2        | 0              | 6.7         | 21.9        | 39.6              | 42.8        | 0.7            | 51.8        | <u>99.3</u> |
|                  |                    |                                                     | 24 h                | 14.9                         | 14.6        | 0              | 2.2         | 7.3         | 30.2              | 43.9        | 66.9           | 82.9        | <u>98.1</u> |
|                  |                    | k <sub>growth</sub> -40%                            | 8 h                 | 14.6                         | 12.2        | 0              | 6.7         | 21.9        | 39.6              | 42.8        | 0.7            | 51.8        | <u>99.3</u> |
|                  |                    |                                                     | 24 h                | 14.9                         | 14.6        | 0              | 2.2         | 7.3         | 30.2              | 43.9        | 66.9           | 82.9        | <u>98.1</u> |
|                  |                    | Higher initial<br>bact. load (S)                    | 8 h                 | 14.6                         | 12.2        | 0              | 6.7         | 21.9        | 39.6              | 42.8        | 0.7            | 51.8        | 99.3        |
|                  |                    |                                                     | 24 h                | 14.9                         | 14.6        | 0              | 2.2         | 7.3         | 30.2              | 43.9        | 66.9           | 82.9        | 98.1        |
|                  |                    | Higher initial<br>bact. load (SR)                   | 8 h                 | 14.6                         | 12.2        | 0              | 6.7         | 21.9        | 39.6              | 42.8        | 0.7            | 51.8        | 99.3        |
|                  |                    |                                                     | 24 h                | 14.9                         | 14.6        | 0              | 2.2         | 7.3         | 30.2              | 43.9        | 66.9           | 82.9        | 98.1        |

Abbreviations: TDD: total daily dose; II: intermittent dosing; CI: continuous infusion; q8/24h: every 8/24 hours; LD: loading dose (in mg); CLCR: creatinine clearance; MIC: minimum inhibitory concentration; s.c. subcutaneous; EC<sub>50</sub>: drug concentration (mg/L) that produces 50% of maximum achievable kill rate constant; k<sub>growth</sub>: rate constant of bacterial growth; k<sub>death</sub>: rate constant of natural bacterial death; higher initial bacterial load: 8 log<sub>10</sub> CFU/mL, either assumed to be susceptible (S) or with an initial fraction in the resting state (SR); categories/colour code:  $fT_{>MIC}=95-100\%$  (bold/underlined, mint),  $fT_{>MIC}=40-95\%$  (bold, light cyan),  $fT_{>MIC}=20-40\%$  (italic, beige),  $fT_{>MIC}=10-20\%$  (non-bold/non-italic, light red),  $fT_{>MIC} \leq 10\%$  (non-bold/non-italic, violet red). Colours were intended to be accessible to people who are colour-blind (<https://davidmathlogic.com/colorblind>; access date 26.07.2022).

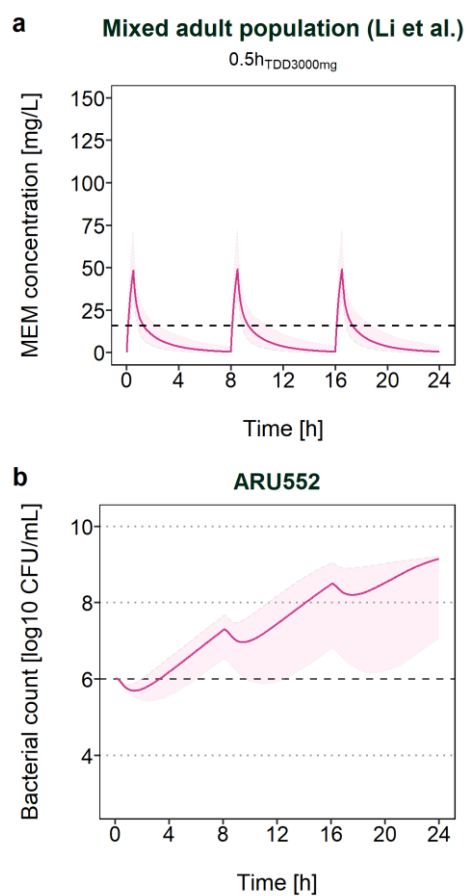

**Figure S1.** Concentration-time profile of meropenem (MEM, Figure a) and resulting bacterial load over time for a resistant *Pseudomonas aeruginosa* strain (ARU552, Figure b) given approved standard dosing of meropenem (1000 mg every 3 hours administered as 0.5-h infusions).

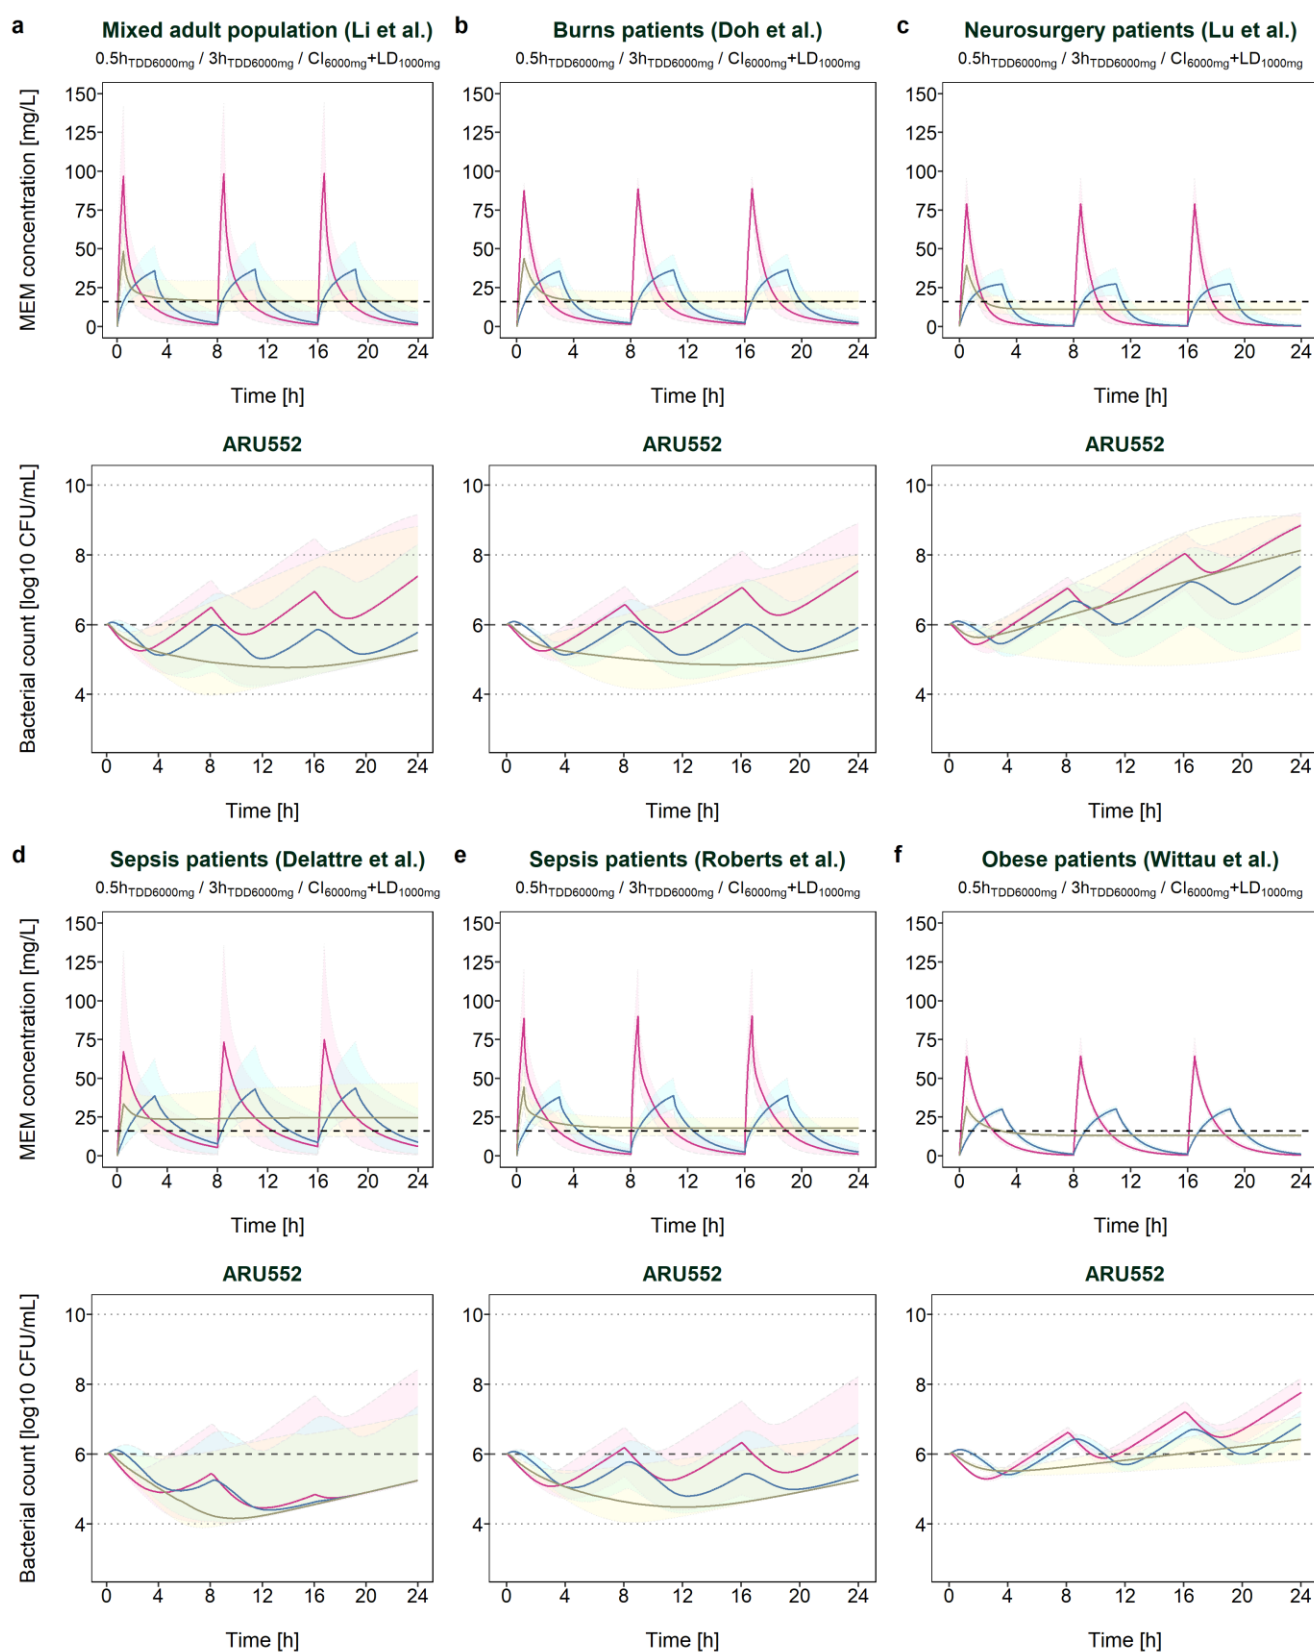

**Figure S2.** Concentration-time profiles of meropenem (MEM) and resulting bacterial load over time for a resistant *Pseudomonas aeruginosa* strain in six different patient populations (a-f) given three dosing regimens: (i) 2000 mg every 8 hours administered as 0.5-h infusions, (ii) 2000 mg every 8 hours administered as 3-h infusions, and (iii) 6000 mg/24 h administered as continuous infusion following a loading dose of 1000 mg.

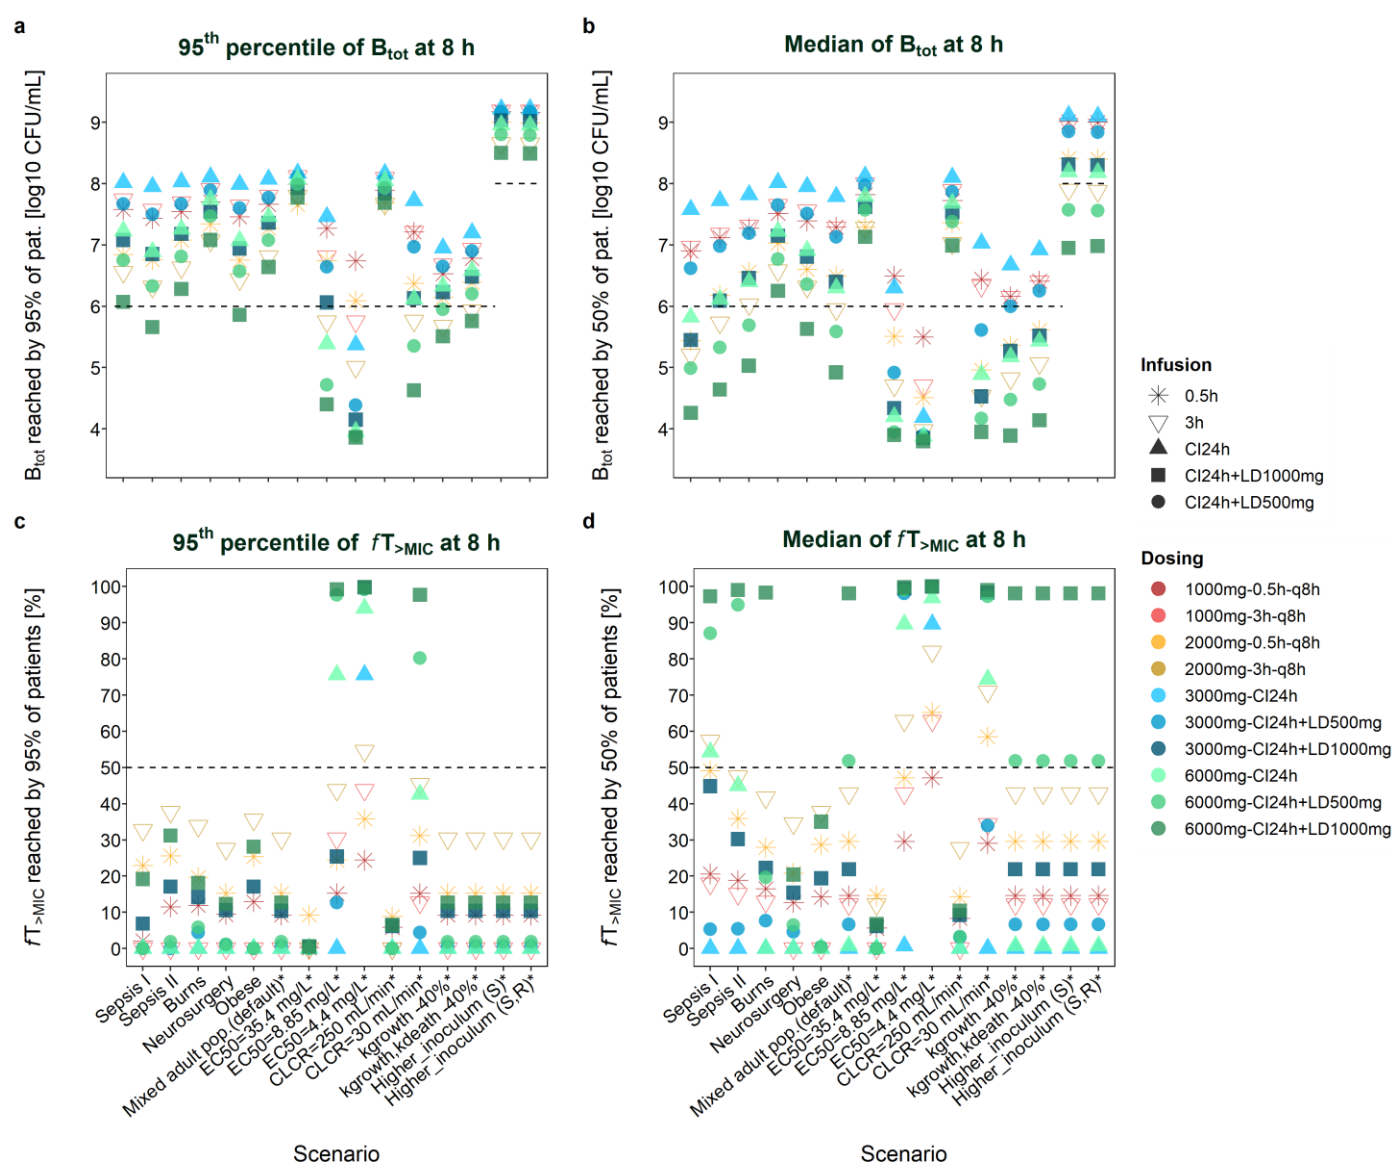

**Figure S3.** Total bacterial load ( $B_{tot}$ , Figures a and b) and  $fT_{>MIC}$  (time that meropenem concentrations exceed the minimum inhibitory concentration, Figures c and d) reached by 95% (Figures a and c) or 50% (Figures b and d) of the patient (pat.) population at 8 h after start of therapy given different scenarios. Sepsis I: Delattre et al. [23]; Sepsis II: Roberts et al. [22] (no renal dysfunction); EC<sub>50</sub>: drug concentration that produces 50% of  $E_{max}$  (maximum achievable kill rate constant); CLCR: creatinine clearance; kgrowth: rate constant of bacterial growth; kdeath: rate constant of natural bacterial death; higher inoculum: initial bacterial load of 8 log<sub>10</sub> CFU/mL, either assumed to be susceptible or with an initial fraction in the resting state; scenarios marked with an asterisk \* refer to a mixed adult population (default scenario; Li et al. [21]); CI: continuous infusion; LD: loading dose; q8h: every 8 hours.

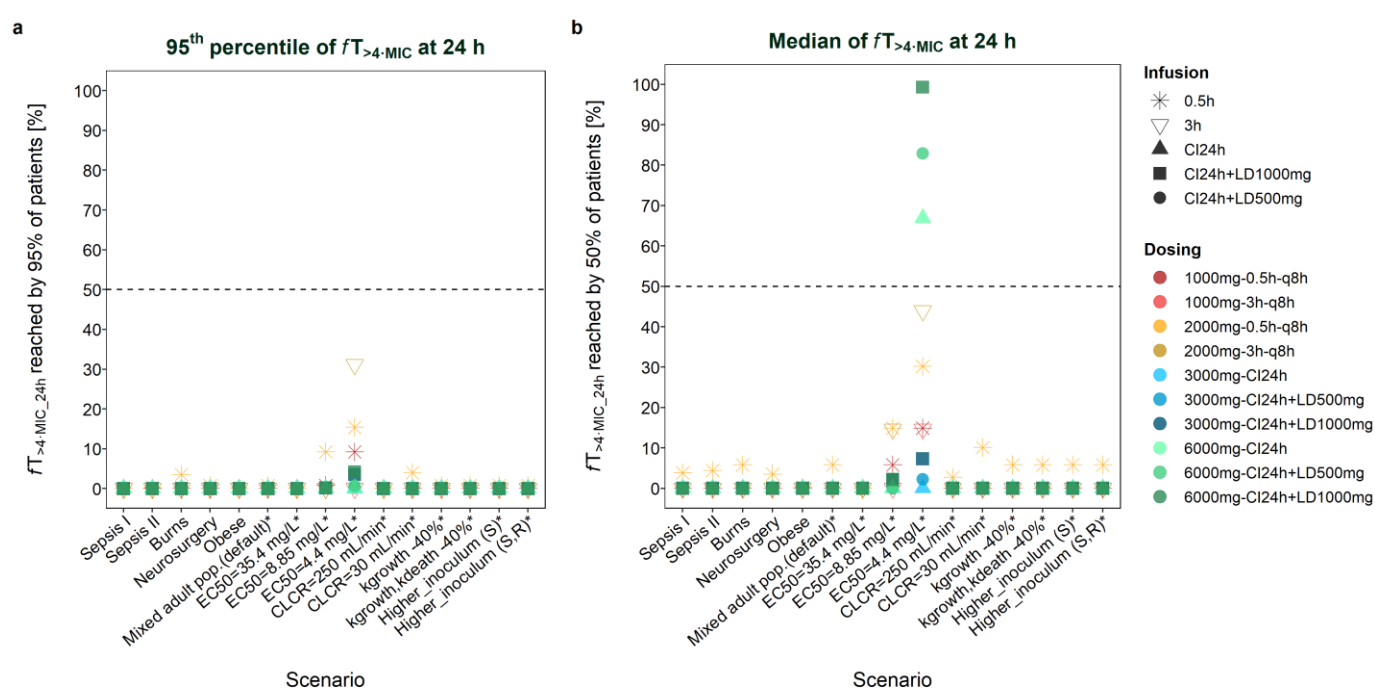

**Figure S4.**  $fT_{>4·MIC}$  (time that meropenem concentrations exceed **four times the minimum inhibitory concentration**) reached by 95% (Figure a) or 50% (Figure b) of the patient population at 24 h after start of therapy given different scenarios. Sepsis I: Delattre et al. [23]; Sepsis II: Roberts et al. [22] (no renal dysfunction); EC<sub>50</sub>: drug concentration that produces 50% of E<sub>max</sub> (maximum achievable kill rate constant); CLCR: creatinine clearance; kgrowth: rate constant of bacterial growth; kdeath: rate constant of natural bacterial death; higher\_inoculum: initial bacterial load of 8 log<sub>10</sub> CFU/mL, either assumed to be susceptible or with an initial fraction in the resting state; scenarios marked with an asterisk \* refer to a mixed adult population (default scenario; Li et al. [21]); CI: continuous infusion; LD: loading dose; q8h: every 8 hours.



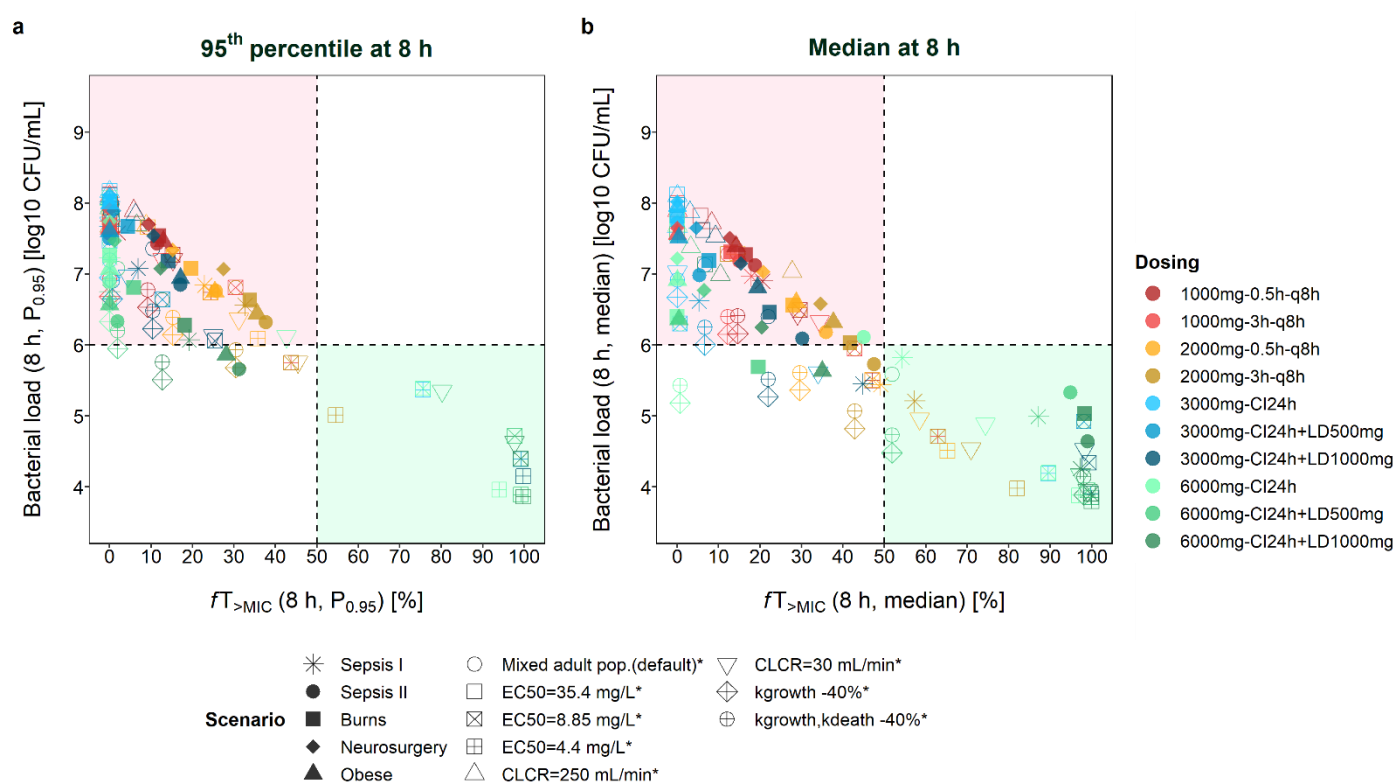

**Figure S5.** Total bacterial load versus  $fT_{>MIC}$  (time that meropenem concentrations exceeded the minimum inhibitory concentration) reached by 95% ( $P_{0.95}$ , Figure a) or 50% (median; Figure b) of the patient population at 8 h after start of therapy given different scenarios. Sepsis I: Delattre et al. [23]; Sepsis II: Roberts et al. [22] (no renal dysfunction);  $EC_{50}$ : drug concentration that produces 50% of  $E_{max}$  (maximum achievable kill rate constant); CLCR: creatinine clearance; kgrowth: rate constant of bacterial growth; kdeath: rate constant of natural bacterial death; higher inoculum: initial bacterial load of 8  $\log_{10}$  CFU/mL, either assumed to be susceptible or with an initial fraction in the resting state; scenarios marked with an asterisk \* refer to a mixed adult population (default scenario; Li et al. [21]); CI: continuous infusion; LD: loading dose; q8h: every 8 hours.

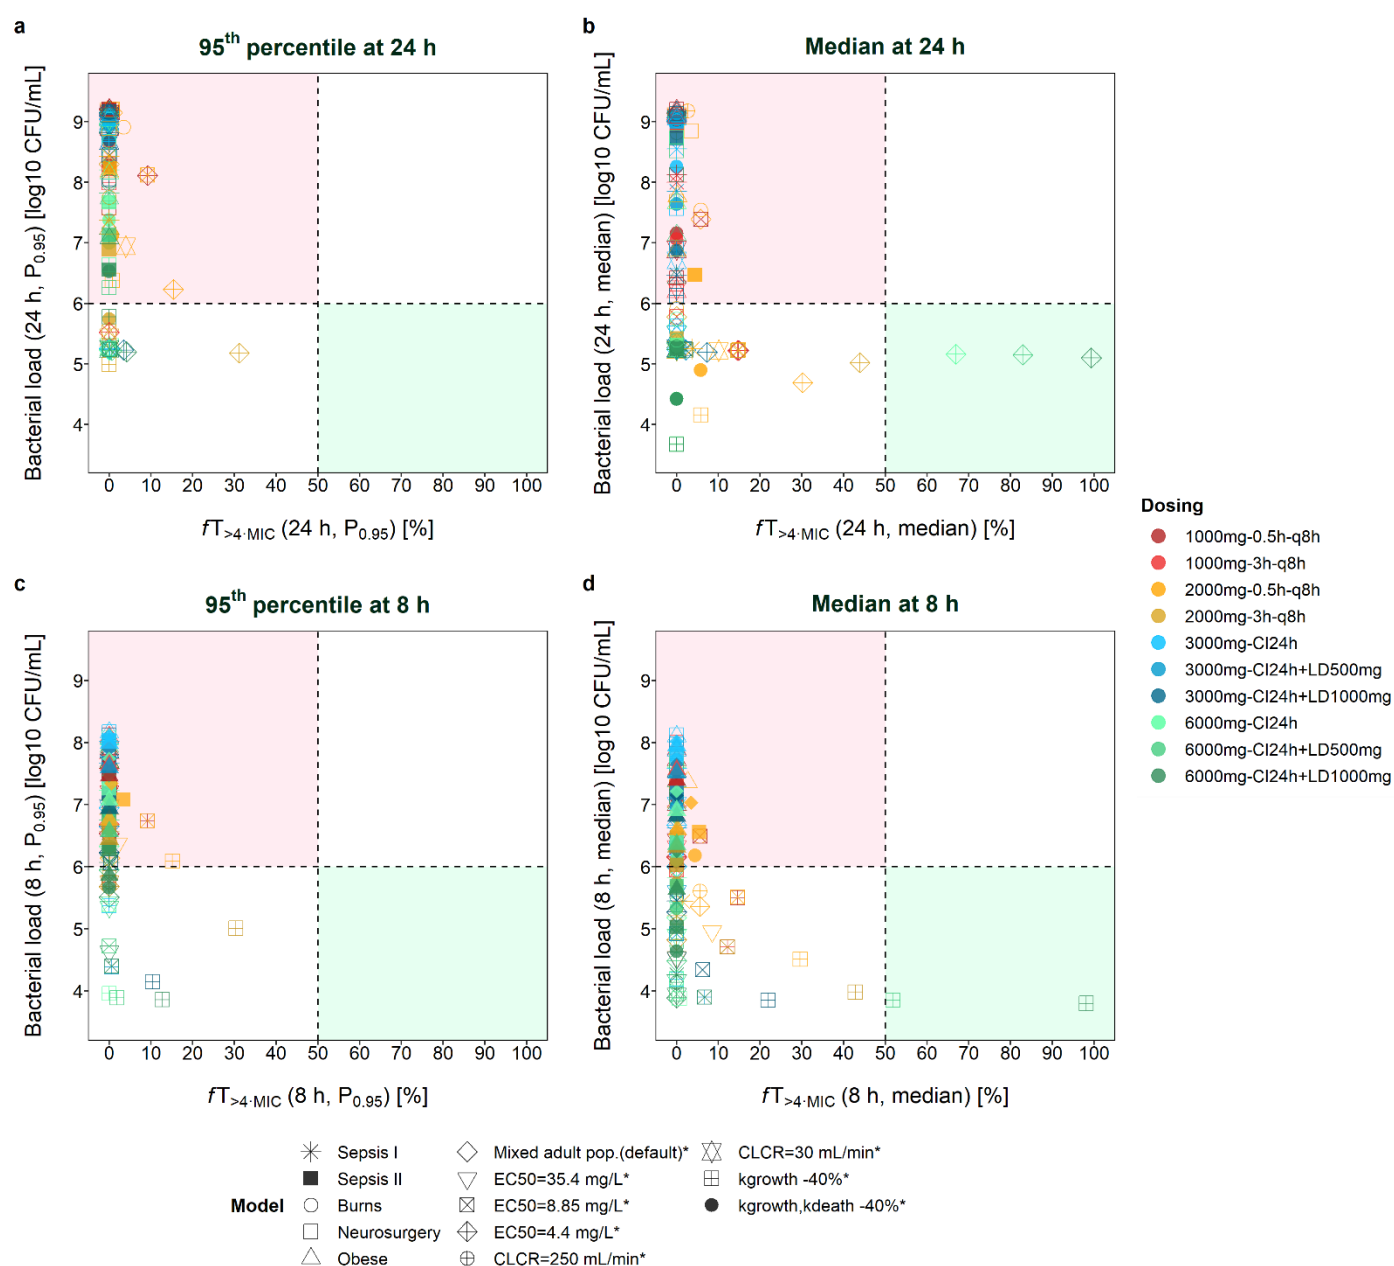

**Figure S6.** Total bacterial load versus  $fT_{>4-MIC}$  (time that meropenem concentrations exceed four times the minimum inhibitory concentration) reached by 95% ( $P_{0.95}$ , Figures a and c) or 50% (median; Figures b and d) of the patient population at 24 h (Figures a and b) and 8 h (Figures c and d) after start of therapy given different scenarios. Sepsis I: Delattre et al. [23]; Sepsis II: Roberts et al. [22] (no renal dysfunction);  $EC_{50}$ : drug concentration that produces 50% of  $E_{max}$  (maximum achievable kill rate constant); CLCR: creatinine clearance; kgrowth: rate constant of bacterial growth; kdeath: rate constant of natural bacterial death; higher inoculum: initial bacterial load of 8 log<sub>10</sub> CFU/mL, either assumed to be susceptible or with an initial fraction in the resting state; scenarios marked with an asterisk \* refer to a mixed adult population (default scenario; Li et al. [21]); CI: continuous infusion; LD: loading dose; q8h: every 8 hours.
